# Supplementary material for: Influence of Mechanical Fatigue at Different States of Charge on Pouch-Type Li-Ion Batteries
Source: Materials (Basel). 2022 Aug 12;15(16):5557. doi: 10.3390/ma15165557 (PMC9413291; doi:10.3390/ma15165557)
Supplement: Supplementary file 1 [file materials-15-05557-s001.zip › materials-1795479-supplementary.pdf]

*Supplementary Materials*

# Influence of Mechanical Fatigue at Different States of Charge on Pouch-Type Li-Ion Batteries

Jin-Yeong Kim <sup>1,†</sup>, Jae-Yeon Kim <sup>2,†</sup>, Yu-Jin Kim <sup>1</sup>, Jaeheon Lee <sup>2</sup>, Kwon-Koo Cho <sup>3</sup>, Jae-Hun Kim <sup>4,\*</sup>  
and Jai-Won Byeon <sup>1,\*</sup>

<sup>1</sup> Department of Materials Science and Engineering, Seoul National University of Science and Technology, Seoul 01811, Korea

<sup>2</sup> Department of Mining and Geological Engineering, University of Arizona, Tucson, AZ 85721, USA

<sup>3</sup> Department of Materials Engineering and Convergence Technology, Research Institute for Green Energy Convergence Technology, Gyeongsang National University, 501, Jinju-daero, Jinju-Si 52828, Korea

<sup>4</sup> School of Materials Science and Engineering, Kookmin University, Seoul 02707, Korea

\* Correspondence: jaehunkim@kookmin.ac.kr (J.-H.K.); byeonjw@seoultech.ac.kr (J.-W.B.); Tel.: +82-2-910-5740 (J.-H.K.); +82-2-970-6634 (J.-W.B.)

† These authors contributed equally to this work.

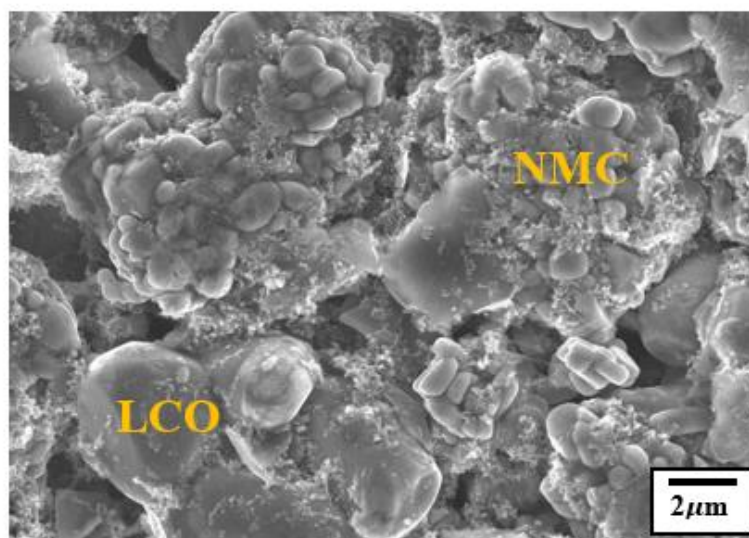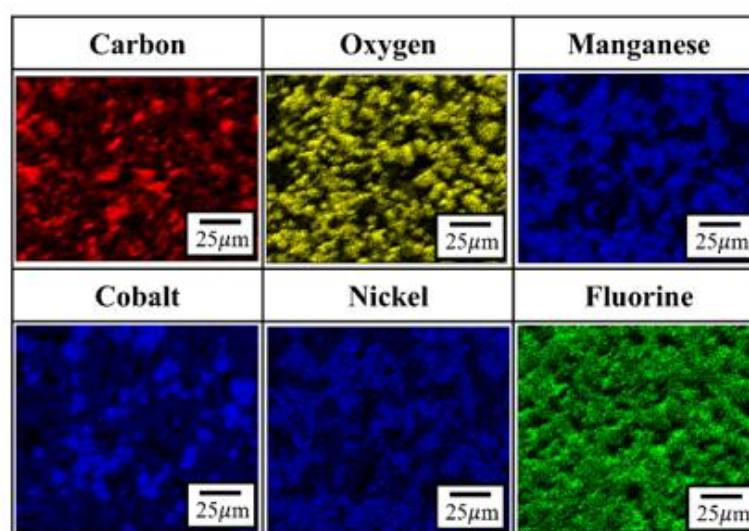

| Element    | C    | O    | Ni   | Co   | Mn   | F    |
|------------|------|------|------|------|------|------|
| Weight (%) | 21.9 | 20.9 | 10.3 | 25.8 | 10.3 | 10.8 |

**Figure S1.** FE-SEM and EDS elemental mapping results for the LCO/NCM cathode. The below table shows the result of EDS mapping analysis.

**Table S1.** Inductively coupled plasma (ICP) analysis result for the LCO/NCM cathode.

| Element    | Li   | Ni   | Co   | Mn   |
|------------|------|------|------|------|
| Weight (%) | 8.00 | 13.0 | 67.3 | 11.7 |

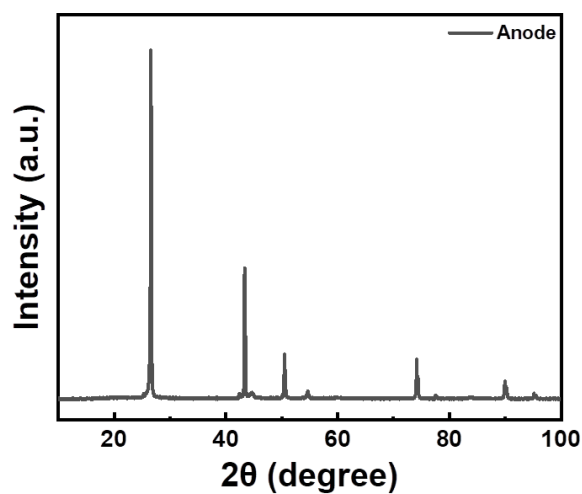

Figure S2. X-ray diffraction pattern (XRD) of the graphite anode.

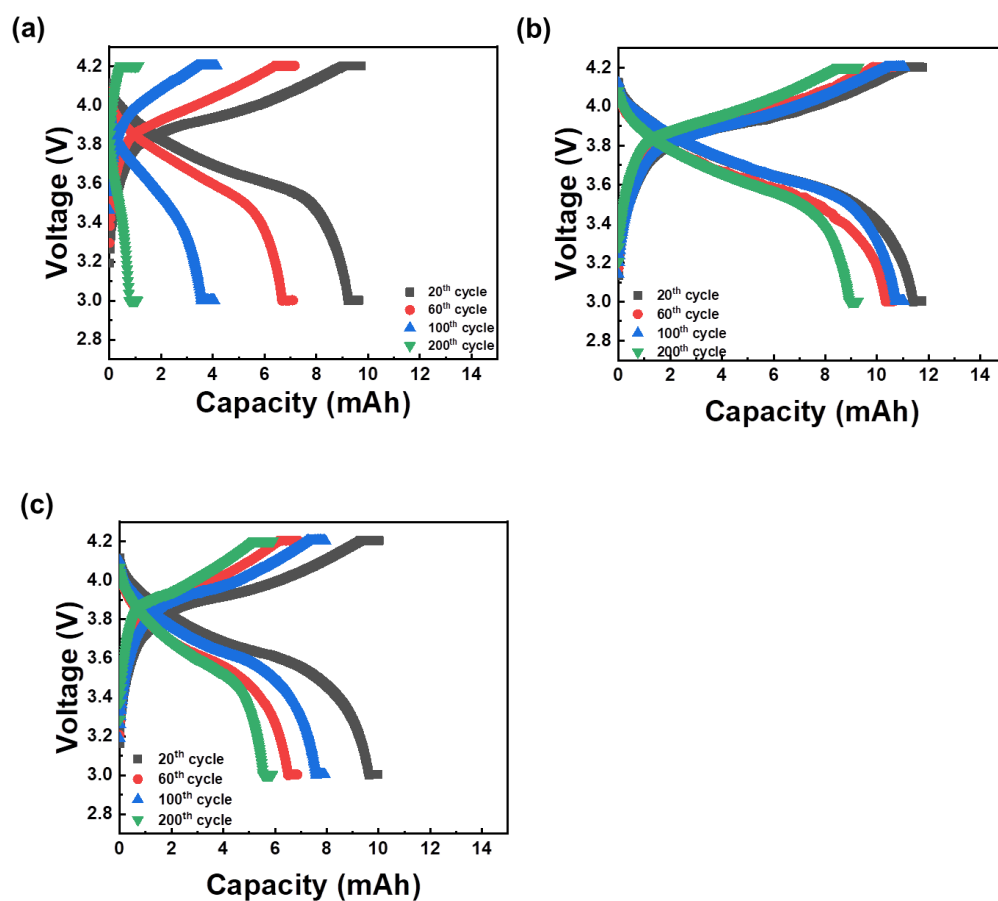

Figure S3. Charge and discharge voltage profiles of the cells after the mechanical fatigue test: (a) SoC 60% cell, (b) SoC 70% cell, and (c) SoC 100% cell.

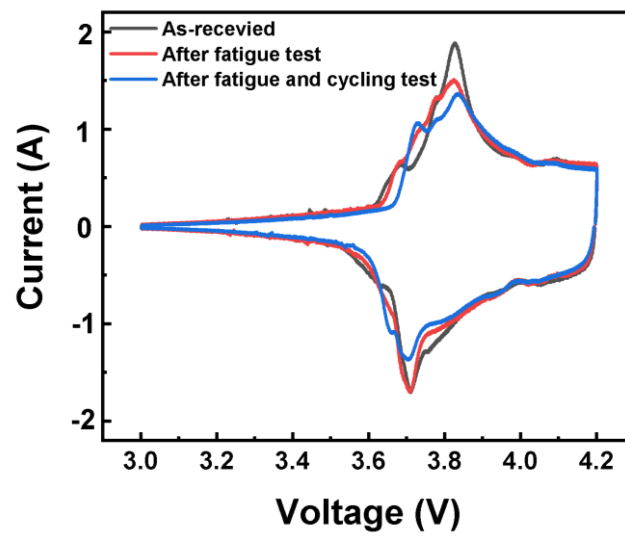

**Figure S4.** Cyclic voltammograms of the cell (initial SoC of 70%) under different test conditions (as-received, after the fatigue test, and after the fatigue and cycling test).

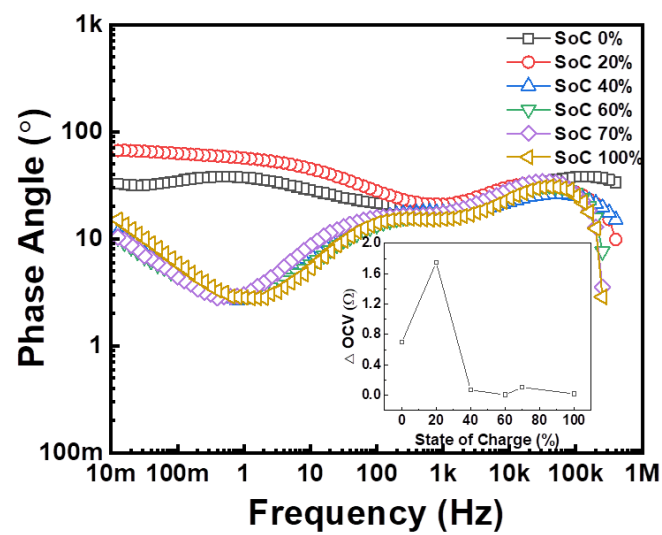

**Figure S5.** Bode plots of the cells with different initial SoCs immediately after the mechanical fatigue test.
